# Supplementary material
Source: bioRxiv or medRxiv preprint supplement (http://medrxiv.org/highwire/filestream/80704/field_highwire_adjunct_files/0/2020.05.11.20092528-1.pdf)
Supplement: Supplementary file [file 2020.05.11.20092528-1.pdf]

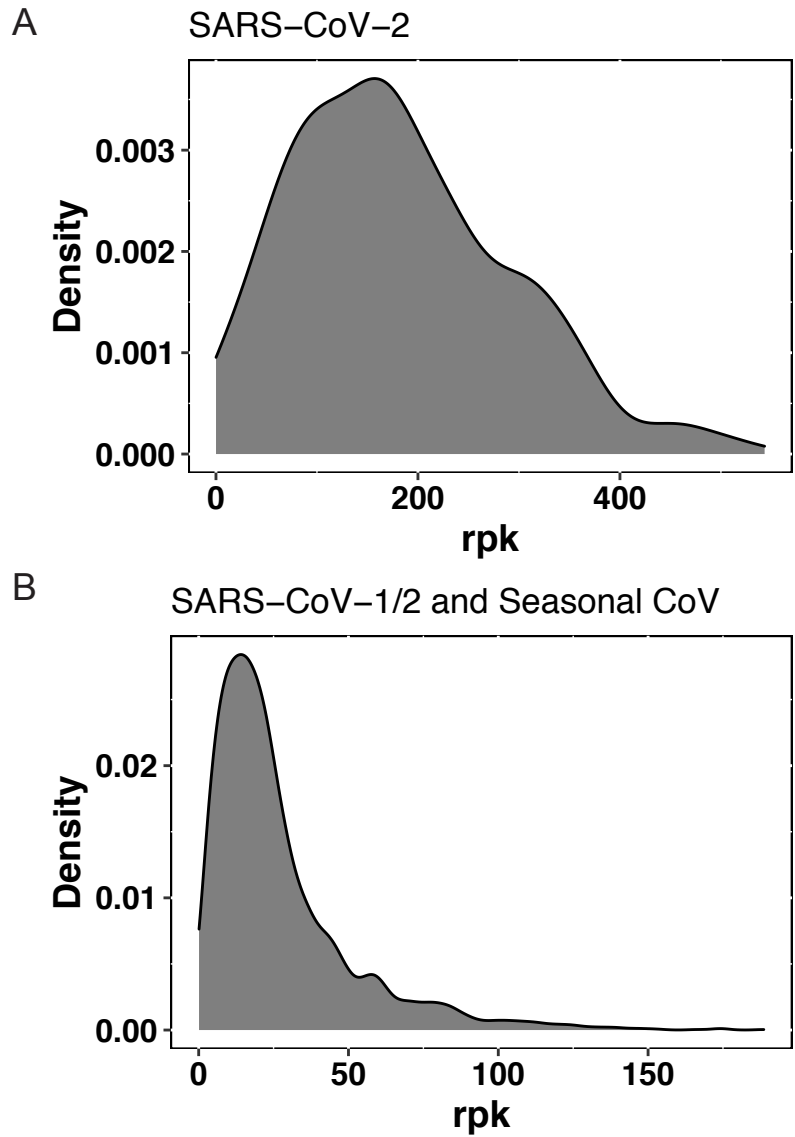

**Extended Data Figure 1.** (A) Distribution of peptides by reads per 100,000 reads (rpk) in the SARS-CoV-2 library used to identify antigens for ReScan. (B) Distribution of peptide rpk in the combined SARS-CoV-2, SARS-CoV-1, and Seasonal CoV library used for VirScan.
